# Supplementary material for: Histone 2-Hydroxyisobutyryltransferase Encoded by Afngg1 Is Involved in Pathogenicity and Aflatoxin Biosynthesis in Aspergillus flavus
Source: MDPI journal article supplement (doi:10.3390/toxins15010007), 2022-12-21
Supplement: s1 [file s1]

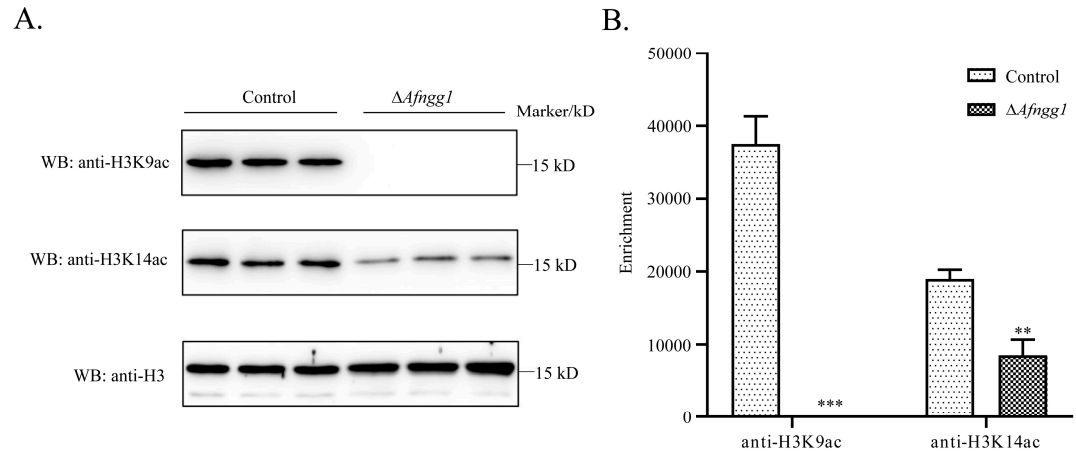

**Figure S1.** Determination of acetylation modification levels of histone H3K9ac and H3K14ac in *A. flavus* control and  $\Delta Afgg1$  strains. **(A)** The acetylation levels of H3K9 and H3K14 were determined using anti-acetyl H3K9 and anti-acetyl H3K14 (ac-H3K14) antibody with anti-acetyl histone 3 as a control. **(B)** Enrichment levels of (A) by the bank optical density method. \*\* and \*\*\* represented  $p < 0.05$  and  $p < 0.001$ , respectively.

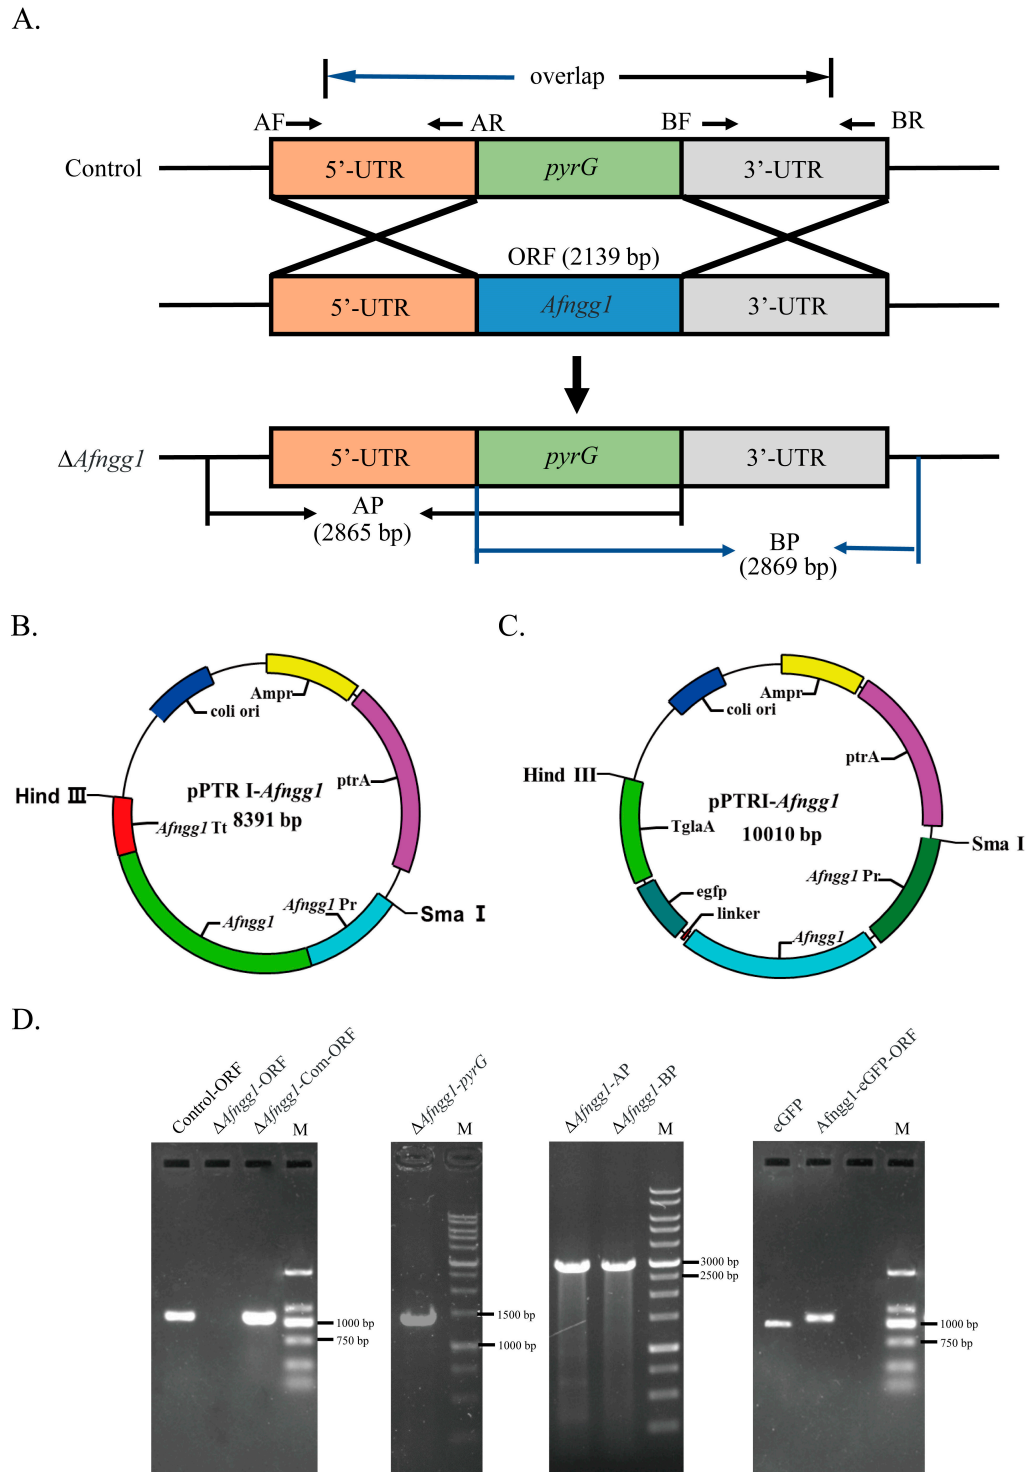

**Figure S2.** Construction and verification of  $\Delta Afngg1$  strain, complement and localization strains. (A) Schematic diagram of  $\Delta Afngg1$  strain construction. (B) Plasmid for *Afngg1* complementation. (C) Plasmid for *Afngg1* localization. (D) Verification of *Afngg1* deletion, complementation and localization strains.

**Table S1.** PCR primers were used in this study.

| Name                  | Sequence (5'-3')                                        |
|-----------------------|---------------------------------------------------------|
| <i>ΔAfnggl-1F</i>     | ctagaggatctactagtcatatggattATGAATGGAGCGGTGAGATTGTTGC    |
| <i>ΔAfnggl-1R</i>     | ctgcggcgcgttctcgaggaagttgcTGTGATGACGGCCCGAAAAGGTGTT     |
| <i>ΔAfnggl-2F</i>     | atgtgtaacggtattgactaaaagggTTCTTCGCTTGCTCCTCATGCAGTTTT   |
| <i>ΔAfnggl-2R</i>     | tcgagctcgggtaccgaggatccgattGCACGTCCCCTTGTTCACTGTTTCGATA |
| <i>ΔAfnggl-iden-F</i> | GCGAGGCAGATGATGAAGAGGAGGAAT                             |
| <i>ΔAfnggl-iden-R</i> | AGAATACAGGCGGCTAACTAATGGACC                             |
| <i>ΔAfnggl-Com-F</i>  | AAACAGCTATGACCATGATTACGCCATGCGCGGTGAGACAGAATCTAAAG      |
| <i>ΔAfnggl-Com-R</i>  | GGCCAGTGAATTCGAGCTCGGTACCCAGGTAACCAGCGGTCCATCATCCAG     |
| <i>Afnggl-eGFP-1F</i> | AAACAGCTATGACCATGATTACGCCAGCAGCAGCAGGTGGAGACATTATTG     |
| <i>Afnggl-eGFP-1R</i> | CTCCTCATCCCAACCTTCAACTTCC                               |
| <i>Afnggl-eGFP-2F</i> | GGAAGTTGAAGGTTGGGATGAGGAGGGCGCAGGCGCCGGCGCAGGCGCCGGC    |
| <i>Afnggl-eGFP-2R</i> | GGCCAGTGAATTCGAGCTCGGTACCCCGGAGATCCTGATCATCCGTGAGAA     |
| <i>pyrG-F</i>         | GCCTCAAACAATGCTCTTCACCC                                 |
| <i>pyrG-R</i>         | GTCTGAGAGGAGGCACTGATGC                                  |
